# Supplementary material
Source: PubMed Central journal article supplement (PMC2705563)
Supplement: 0901326106_0901326106SI.pdf [file 0901326106_0901326106SI.pdf]

# Supporting Information

Ahmad et al. 10.1073/pnas.0901326106

## SI Methods

**Cell Culture and Exposure.** HLMVECs and HCAECs were cultured in endothelial cell basal medium (EBM-2) supplemented with VEGF, human FGF, human EGF, hydrocortisone, ascorbic acid, insulin-like growth factor-1, GA-1000 (gentamicin/amphotericin-B), and 5% FBS per the supplier's protocol (Lonza). Murine brain microvascular endothelial cells (MB114) and SV-40-transformed mouse endothelial cells (SVECs) were cultured in DMEM supplemented with 10% FBS, penicillin, and streptomycin.

**RNA Isolation and Northern Blot Analysis.** Twenty-four hours after transduction or treatment, cells were washed twice with HBSS and harvested in guanidine isothiocyanate (GITC). RNA was purified by using the CsCl method, as described previously (1). A total of 15  $\mu$ g of total RNA was resolved on 1% formaldehyde-agarose gels and transferred to nylon membranes. Probes used for Northern blotting were derived from human  $A_{2A}$  cDNA and human  $A_{2B}$  cDNA, kindly provided by Marlene Jacobson. The VEGF cDNA was obtained from the Harvard Institute of Proteomics (Boston). The cDNA probes were labeled with [ $^{32}$ P] $\alpha$ -dCTP (ICN) by random priming and were hybridized with the membrane for 18 h at 42 °C. Membranes were then washed and autoradiographed. For loading controls, membranes were stripped of radioactive probe in a 2% glyceraldehyde solution at 80 °C and rehybridized with an end-labeled 28S rRNA oligonucleotide (Ambion). The intensity of the radiolabeled bands was measured by using a PhosphorImager running ImageQuant software (Molecular Dynamics).

**Thymidine Incorporation Assay.** Proliferation of HLMVECs was measured by using [ $^3$ H]thymidine incorporation. About 20,000 cells were plated in each well of a 24-well plate in endothelial cell complete medium. After 24 h, cells were washed once with HBSS and were serum starved in EBM-2 medium containing 1% FBS, hydrocortisone, ascorbic acid, and GA-1000. After 24 h, cells were incubated with [ $^3$ H]thymidine (1  $\mu$ Ci per well) in the presence or absence of the adenosine  $A_{2A}$  receptor agonist, CGS-21680, at varying concentrations for an additional 24 h. Subsequently, cells were washed twice with ice-cold PBS, precipitated with 0.1 M perchloric acid, and solubilized with 0.01 M NaOH containing 0.1% SDS before scintillation counting. Similarly, proliferation was also measured in cells transduced with Ad. $A_{2A}$  or Ad.LacZ at a multiplicity of infection of 10 pfu per cell.

**Angiogenesis Assay.** Angiogenesis in HLMVECs was assessed by using the Matrigel tube-formation assay. Growth factor-reduced Matrigel matrix was coated onto 24-well plates and allowed to solidify at 37 °C for 30 min. HLMVECs were then trypsinized and plated onto the Matrigel in the absence of growth factors or serum and were incubated at 37 °C in a CO<sub>2</sub> incubator. The  $A_{2A}$  receptor agonist, CGS-21680, or the diluent control was included both in the Matrigel matrix and the overlying medium. Four hours after plating of cells, 3 randomly chosen fields from each well were photographed. Branch points were counted and plotted.

**Angiogenic Migration Assay.** HLMVECs were either untransduced, transduced with Ad. $A_{2A}$ , or transduced with Ad.LacZ at a multiplicity of infection of 10 pfu per cell. Twenty-four hours after transduction, cells were split, and 100,000 cells were plated on a fibronectin-coated insert in EBM-2 medium containing 0.1% FBS, hydrocortisone, ascorbic acid, and GA-1000. Before plating cells, inserts were coated with 50  $\mu$ g/mL fibronectin

solution in PBS by adding 0.3 mL of the solution to the lower side of the insert and were kept at 4 °C for 24 h. Just before adding cells, the inserts were washed twice with PBS to remove unbound fibronectin. Cells were incubated in a humidified cell culture incubator with 5% CO<sub>2</sub>, balance air, for an additional 24 h, after which they were washed twice with PBS, followed by fixation with 95% EtOH. The inserts were then stained with crystal violet and washed with water to remove unincorporated dye. Stained cells on the apical side of the insert were removed by using a swab. The membrane was cut along the edges and scanned for photography. A minimum of 8 frames per membrane were collected, and cells in each frame were counted. The mean number of cells per frame was plotted.

**Promoter Luciferase Assay.** The  $A_{2A}$  receptor promoter constructs, cloned in pSSG-luciferase reporter vectors (a variant of pGL4.11 vector from Promega), were obtained from SwitchGear Genomics. Promoter activity of the  $A_{2A}$  receptor gene was assessed by using a luciferase reporter construct, R5. HLMVECs were transfected with the  $A_{2A}$  reporter vectors or the empty control (pGL4.11), together with mutHIF-2 $\alpha$  construct by using the DharmaFect Duo transfection reagent (Dharmacon). A CMV- $\beta$ -gal plasmid cotransfection was also used to control for transfection efficiency. Forty hours after transfection, cells were harvested and lysed by using the reporter lysis buffer (Promega).  $\beta$ -Gal assays were performed with a commercially available kit (Stratagene). Luciferase activities were determined with equal amounts of protein by using a commercially available luciferase assay system (PharMingen) and a Monolight 3010 luminometer (Analytical Luminescence Laboratory). The relative luciferase units were normalized to the internal  $\beta$ -gal control values and plotted.

**ChIP.** ChIP assays were performed on HLMVECs by using standard protocol. About 45 million cells in 100-mm plates were exposed to air (21% O<sub>2</sub>) or hypoxia (1% O<sub>2</sub>) for 6 h. After hypoxic exposure, cells were washed with PBS and cross-linked in a solution of 10% formaldehyde with gentle shaking for 20 min. The cross-linking was stopped by the addition of glycine to a final concentration of 0.125 M. Cells were then washed with cold PBS, scraped, and pelleted. The pellet was resuspended in lysis buffer (50 mM Tris-HCl, pH 8.1, containing 1% SDS, 5 mM EDTA, and Calbiochem protease inhibitor mixture) for 10 min, after which the samples were sonicated 5 times for 15 sec each by using a Branson Sonicator. After clearing the lysate, a part of the soluble chromatin was diluted 5-fold in PBS and reverse cross-linked at 65 °C overnight for use as an input control. The remaining soluble chromatin was diluted 10-fold with the dilution buffer (20 mM Tris, pH 8.1; 2 mM EDTA; and 1% Triton X-100) and precleared with Protein G beads (GE Healthcare Life Sciences). The samples were incubated at 4 °C overnight with either a control antibody or rabbit polyclonal antibody against HIF-2 $\alpha$  (Novus Biologicals). The chromatin-immunoprecipitated DNA was PCR amplified by using specific primers for  $A_{2A}$  receptor (forward: 5'-CAGGTTGCCAGTCCTGCTCCATC; and reverse: ACCTGCCTGGGGACAAGAGGTC-3') and PGK-1 (forward: 5'-GTTTCGACGCGTACCCGGATCTTCG-3'; and reverse: 5'-AGGCTTGCAAGATGCGGAACACC-3'). The following conditions were used for PCR amplification of PGK-1: 1 cycle of 95 °C for 3 min; 33 cycles of 95 °C for 30 sec, 65 °C for 30 sec, and 72 °C for 20 sec; and 1 cycle of 72 °C for 5 min; and for  $A_{2A}$  receptor: 1 cycle of 95 °C for 3 min; 31 cycles of 95 °C for 30 sec, 62 °C for 30 sec, and 72 °C for 20 sec; and 1 cycle of 72 °C 5 min.

1. Riddle SR, et al. (2000) Hypoxia induces hexokinase II gene expression in human lung cell line A549. *Am J Physiol Lung Cell Mol Physiol* 278:L407-L416.

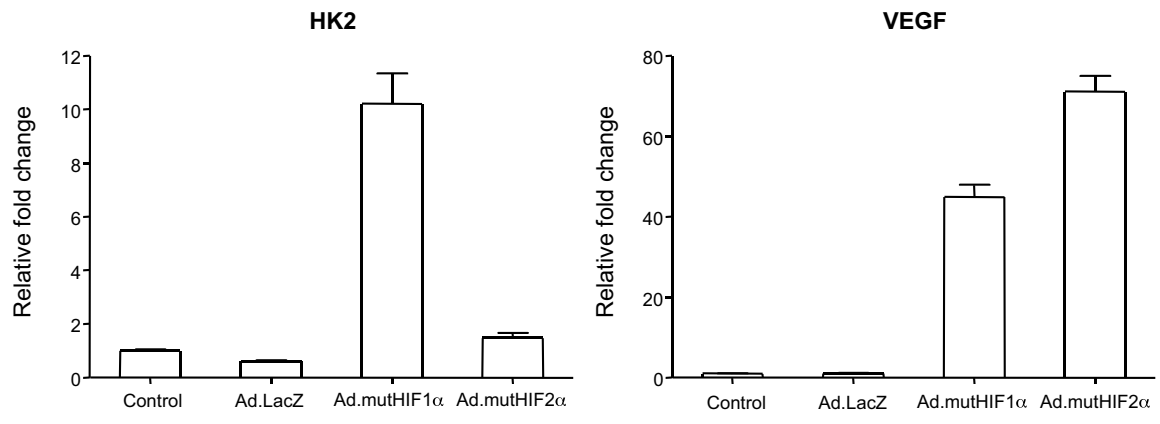

**Fig. S1.** Effect of HIFs on the expression of HK2 and VEGFA. Endothelial cells (HLMVECs) were transduced with Ad.LacZ, Ad.HIF-1 $\alpha$ , or Ad.HIF-2 $\alpha$  at a multiplicity of infection of 15 pfu per cell for 24 h. Total RNA was isolated, and 1  $\mu$ g was reverse transcribed by using random primed hexamers. Real-time PCR was carried out by using a total of 25 ng of reverse-transcribed cDNA along with specific primers and probes for HK2, VEGFA, and 18S rRNA. Data were normalized per 18S.

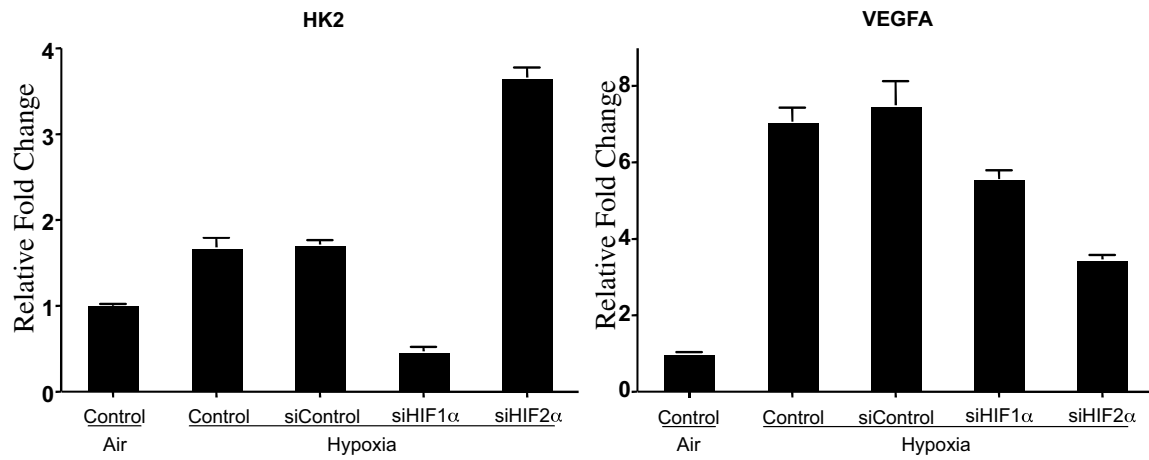

**Fig. S2.** Effect of siRNA knockdown of HIFs on the expression of HK2 and VEGFA under hypoxia. Endothelial cells (HLMVECs) were transfected with siRNA against HIF-1 $\alpha$ , HIF-2 $\alpha$ , or the control siRNA. Twenty-four hours after transfection, cells were exposed to hypoxia (0% O<sub>2</sub>) for an additional 24 h. Total RNA was isolated, and 1  $\mu$ g was reverse transcribed by using random primed hexamers. Real-time PCR was carried out by using a total of 25 ng of reverse-transcribed cDNA along with specific primers and probes for HK2, VEGFA, and 18S rRNA. Data were normalized per 18S.

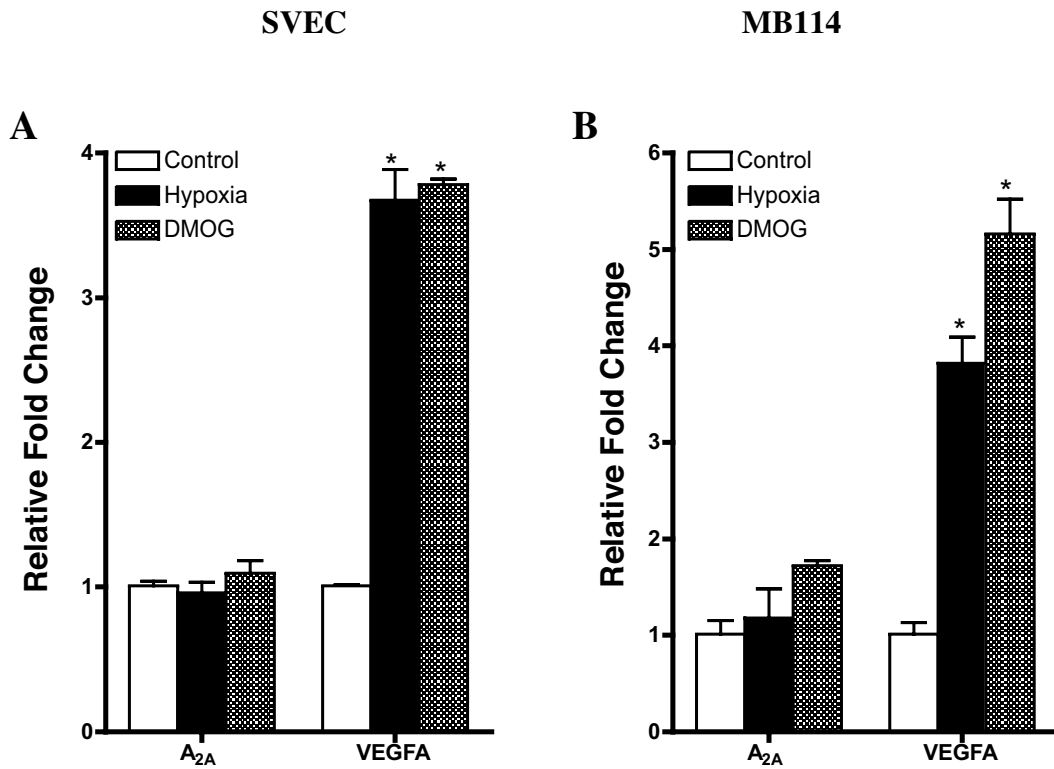

**Fig. S3.** Effect of hypoxia and DMOG, an inhibitor of HIF prolyl-4-hydroxylases, which causes stabilization of both HIF-1 $\alpha$  and HIF-2 $\alpha$ , on the levels of adenosine A<sub>2A</sub> receptor steady-state mRNA levels in mouse-derived endothelial cells. Endothelial cells, SVECs (A) and MB114 cells (B), were exposed to air (21% O<sub>2</sub>), hypoxia (0% O<sub>2</sub>), or 1 mM DMOG for 24 h. Total RNA was isolated, and 1  $\mu$ g was reverse transcribed by using random primed hexamers. Real-time PCR was carried out by using a total of 25 ng of reverse-transcribed cDNA along with specific primers and probes for adenosine A<sub>2A</sub> receptor, VEGFA, and 18S rRNA. Data were normalized per 18S.
